# Supplementary material
Source: Springer Nature journal article supplement (https://www.springermedizin.de/resource/supplementary/12985_2010_1019_MOESM7_ESM.pdf/9608966)

**A**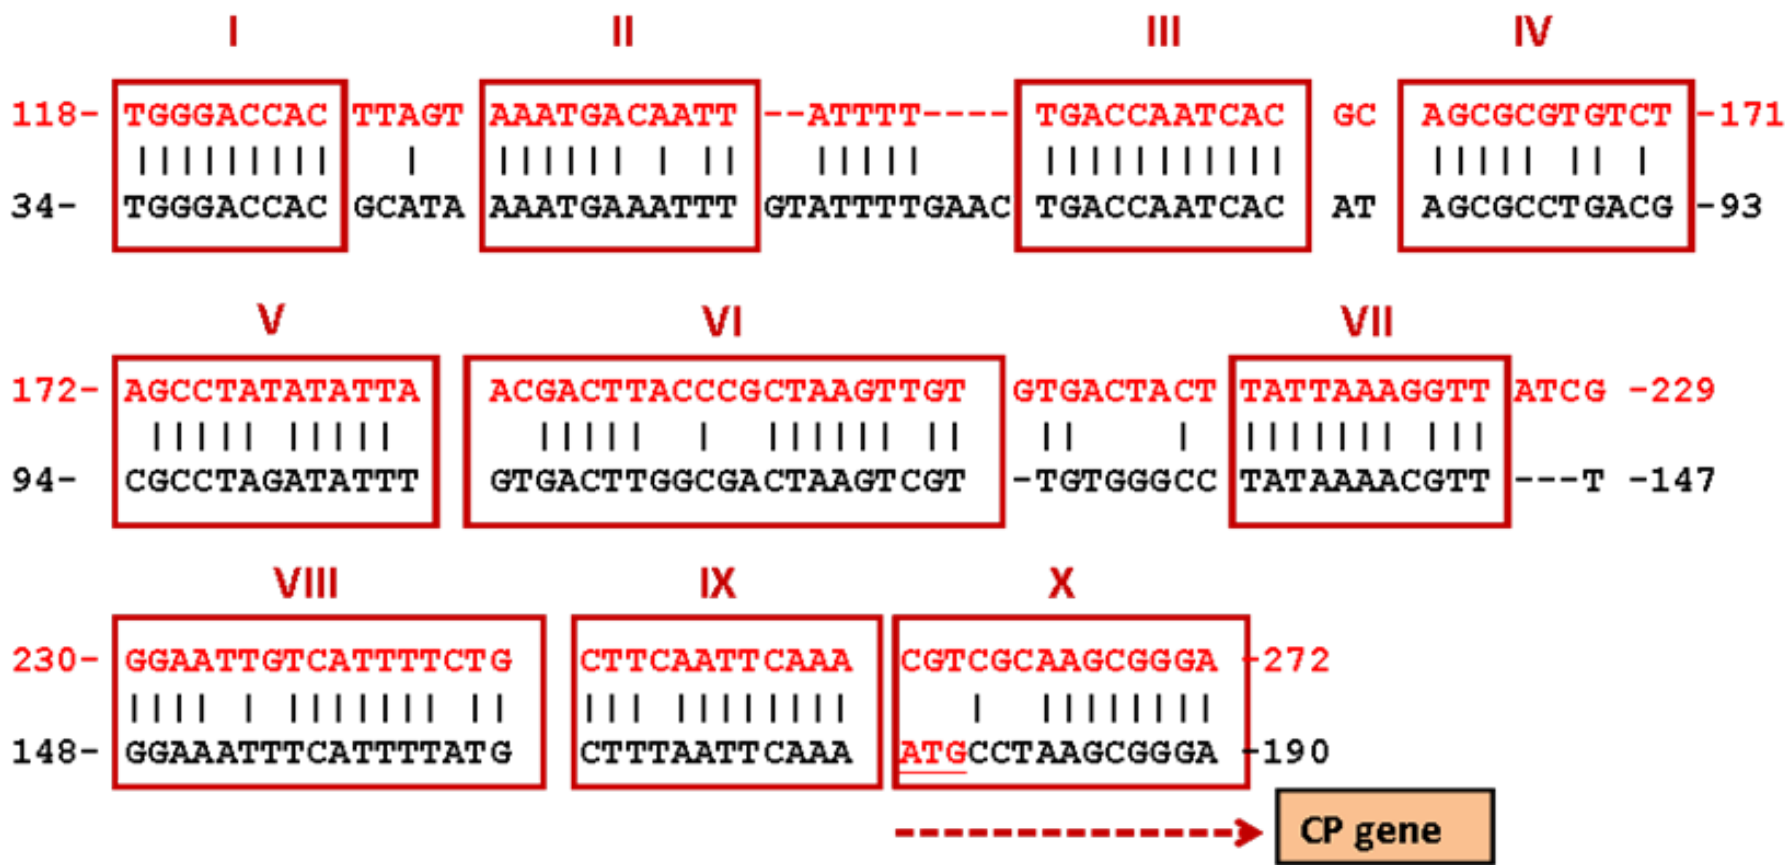

EuMV-Jal DNA B  
 RhGMYuV DNA A

Supplement: MOESM7 [file 9608966]
